# Supplementary material for: The First Defined Null Allele of the Notch Regulator, a Suppressor of Deltex: Uncovering Its Novel Roles in Drosophila melanogaster Oogenesis
Source: MDPI journal article supplement (doi:10.3390/biom14050522), 2024-04-26
Supplement: s1 [file s1]

## Supplemental figure legends

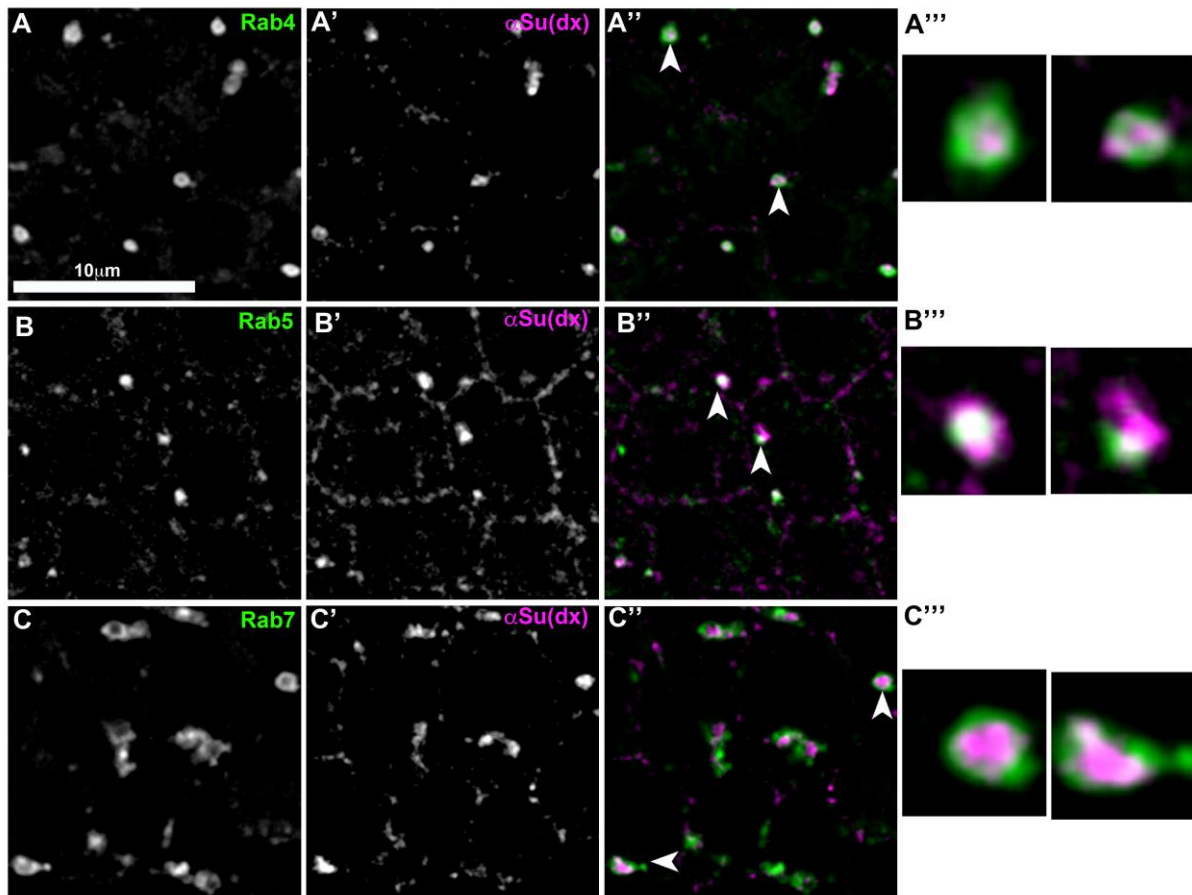

**Supplemental Figure S1. Localisation of Su(dx) in the endocytic pathway.** Anti Su(dx) (magenta) localisation in organelles marked with endogenously tagged (**A-A'''**) Rab4-EYFP, (**B-B'''**) Rab5-EYFP and (**C-C'''**) Rab7-EYFP (Green). Arrow heads mark endosomes depicted in enlarged images in **A'''**, **B'''** and **C'''**. Immunostaining performed on egg chamber follicle cells.

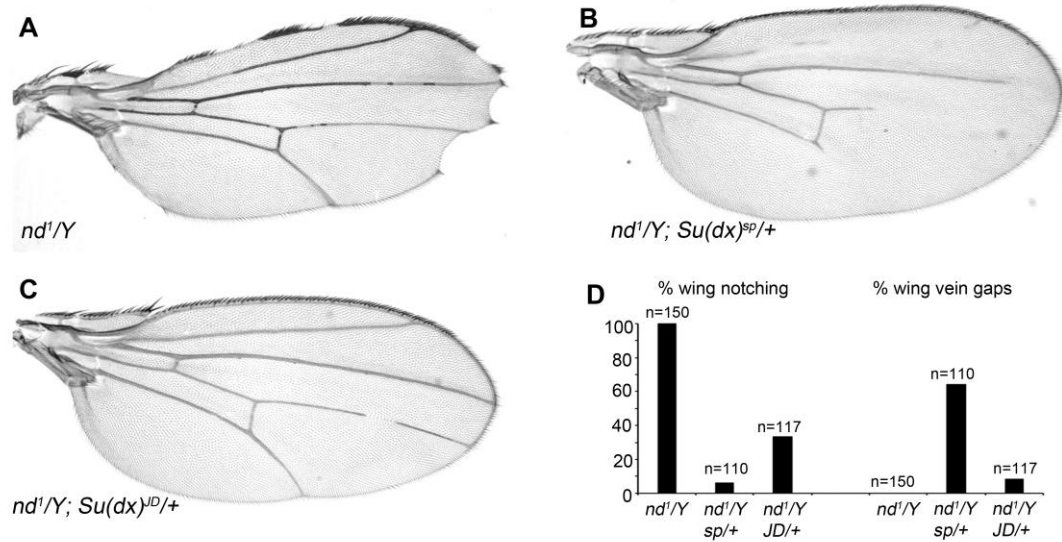

**Supplemental Figure S2. Genetic interaction of *Su(dx)* alleles with *Notch* hypomorphic allele *nd*<sup>1</sup>.** (A) Wing of *nd*<sup>1</sup>/*Y* fly showing extensive notching around the wing margin. (B) Heterozygous *Su(dx)*<sup>sp</sup> allele, suppresses the wing margin notching of *nd*<sup>1</sup>/*Y* and introduces strong wing vein gap phenotype. (C) Heterozygous *Su(dx)*<sup>JD</sup> allele, also suppresses the wing margin notching of *nd*<sup>1</sup>/*Y* and introduces wing vein gap phenotype but these are smaller and less penetrant than in the interaction with *Su(dx)*<sup>sp</sup>. (D) Quantification of genetic interactions depicted in A-C. *Su(dx)*<sup>JD</sup> allele behaves in a qualitatively similar manner to *Su(dx)*<sup>sp</sup> but with a less penetrant outcome.
